# Supplementary material
Source: publisher figshare collection journal article supplement (https://acs.figshare.com/ndownloader/files/3711058)
Supplement: Supplementary file 1 [file 3711058]

# **Supporting Information**

# A Highly Sensitive Thin-Film Field-Effect Transistor Sensor for Ammonia with the DPP-Bithiophene Conjugated Polymer Entailing Thermally Cleavable *tert*-Butoxy Groups in the Side Chains

Yang Yang, Guanxin Zhang,\* Hewei Luo, JingJing Yao, Zitong Liu, Deqing Zhang\*

†Beijing National Laboratory for Molecular Sciences, Organic Solids Laboratory, Institute of Chemistry, Chinese Academy of Sciences, Beijing 100190, China.

E-mails: dqzhang@iccas.ac.cn (D. Z.), gxzhang@iccas.ac.cn (G. Z.).

## Contents

|                                                                                                                       |     |
|-----------------------------------------------------------------------------------------------------------------------|-----|
| 1. GIXRD patterns of thin films of pDPPBu-BT.....                                                                     | S-3 |
| 2. Variation of $I_{DS}$ upon exposure to different concentrations of ammonia.....                                    | S-3 |
| 3. Reusability of the FET sensor for ammonia.....                                                                     | S-4 |
| 4. Transfer characteristics and the variation of $I_{DS}$ vs time for FET of pDPPBu-BT after exposure to ammonia..... | S-4 |
| 5. Variation of FT-IR spectra of pDPPCOOH-BT before and after exposure to ammonia.....                                | S-5 |
| 6. Variation of hole mobility upon exposure to different concentrations of ammonia.....                               | S-5 |
| 7. $^1\text{H}$ NMR and $^{13}\text{C}$ NMR spectra.....                                                              | S-6 |

## 1. GIXRD patterns of thin films of pDPPBu-BT

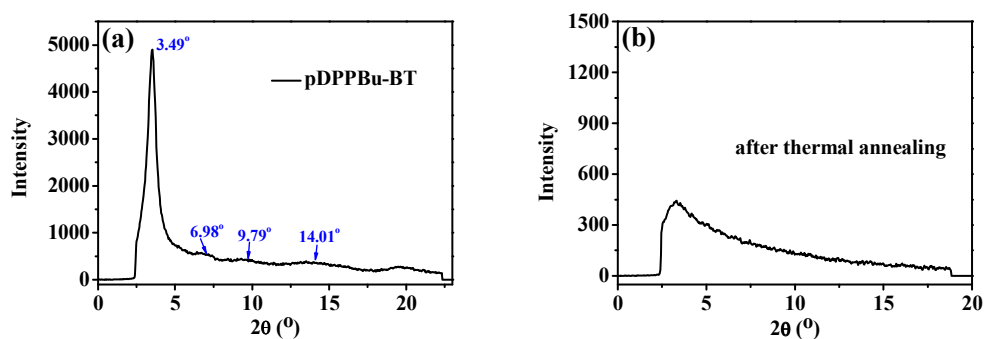

**Figure S1.** GIXRD patterns of thin films of pDPPBu-BT before (a) and after (b) thermal annealing at 240 °C for 30 min.

## 2. Variation of $I_{DS}$ upon exposure to different concentrations of ammonia

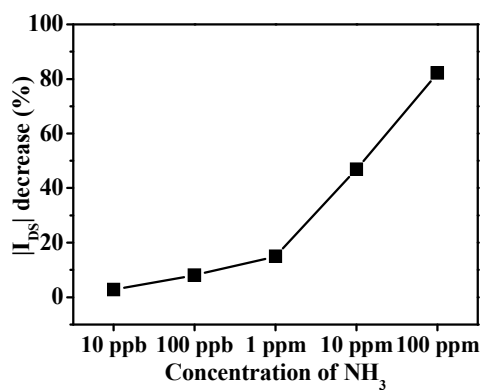

**Figure S2.** Variation of  $I_{DS}$  for FET with pDPPCOOH-BT after exposure to different concentrations of ammonia (10 ppb-100 ppm).

### 3. Reusability of the FET sensor for ammonia

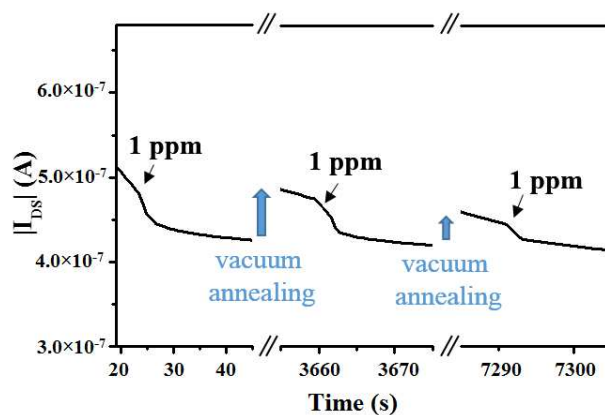

**Figure S3.** The variation of  $I_{DS}$  after exposure to ammonia and the reusability of this FET sensor for ammonia; the FET after exposure to ammonia was annealed at 80°C for 1.0 h under vacuum, followed by exposure to ammonia again.

### 4. Transfer characteristics for FET of pDPPBu-BT before and after exposure to ammonia and the variation of $I_{DS}$ vs time after exposure to ammonia (1000 ppm)

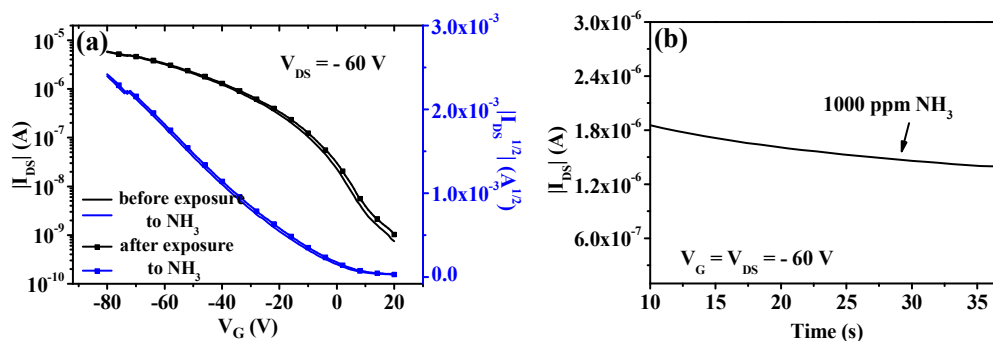

**Figure S4.** (a) Transfer characteristics for FET of pDPPBu-BT before and after exposure to ammonia (1000 ppm) and (b) variation of  $I_{DS}$  vs time for FET of pDPPBu-BT after exposure to ammonia (1000 ppm).

## 5. Variation of FT-IR spectra of pDPPCOOH-BT before and after exposure to ammonia

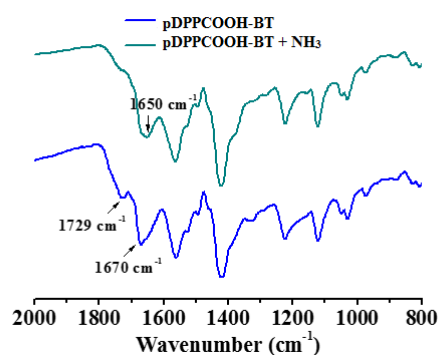

**FigureS5.** FT-IR spectra of pDPPCOOH-BT, which was obtained from pDPPBu-BT after thermal annealing at 240 °C for 30 min. before and after exposure to ammonia.

## 6. Variation of hole mobility upon exposure to different concentrations of ammonia

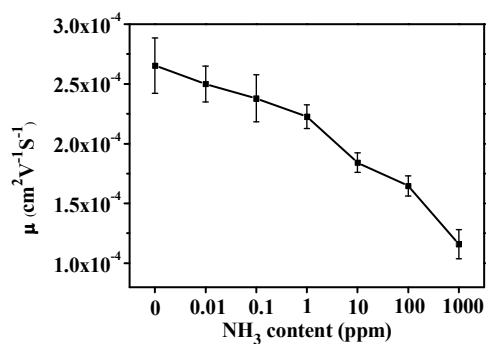

**Figure S6.** Variation of hole mobility upon exposure to different concentrations of ammonia.

# 7. $^1\text{H}$ NMR and $^{13}\text{C}$ NMR spectra

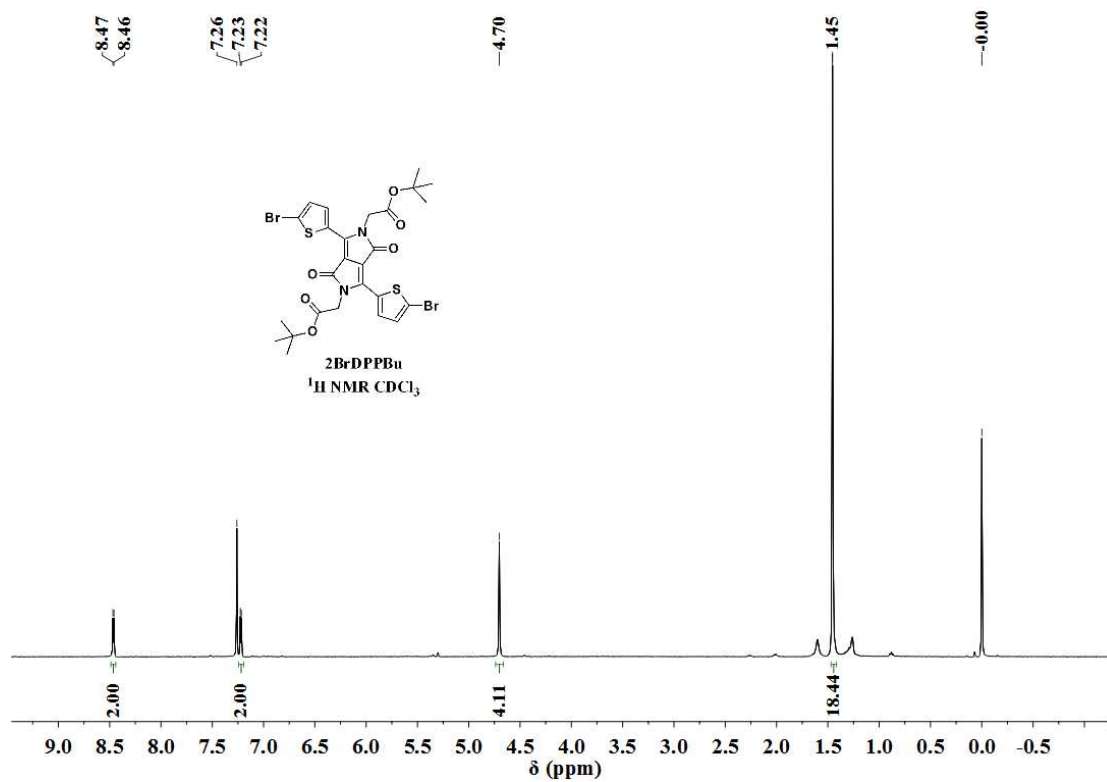

Figure S7.  $^1\text{H}$  NMR of 2BrDPPBu.

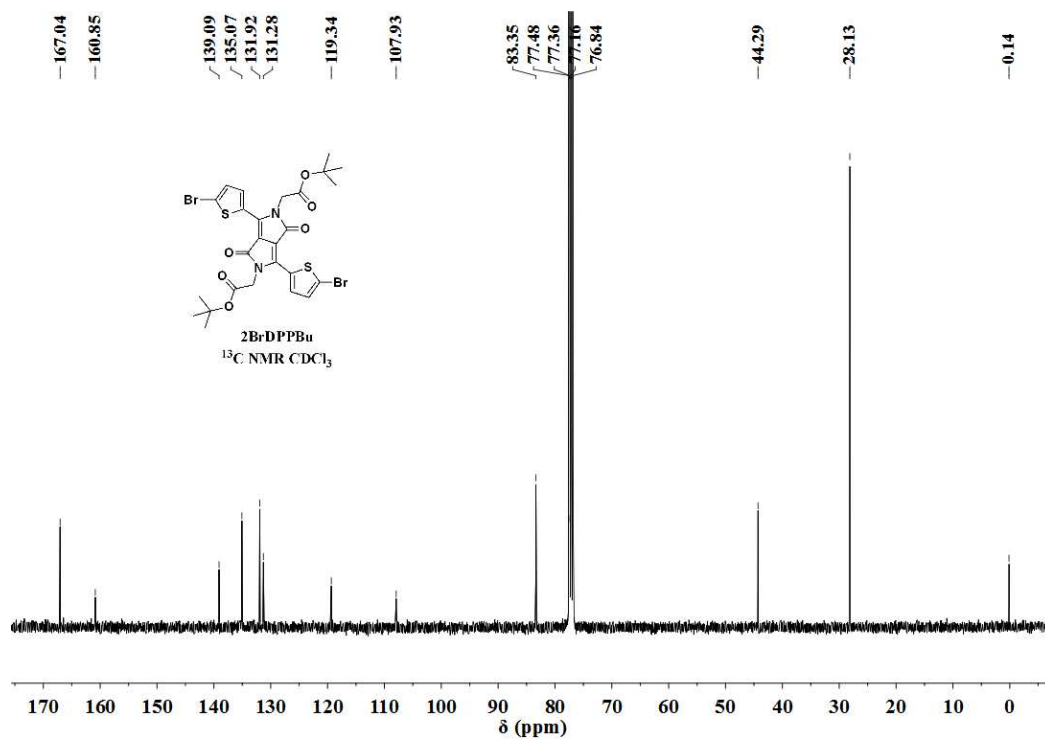

Figure S8.  $^{13}\text{C}$  NMR of 2BrDPPBu.

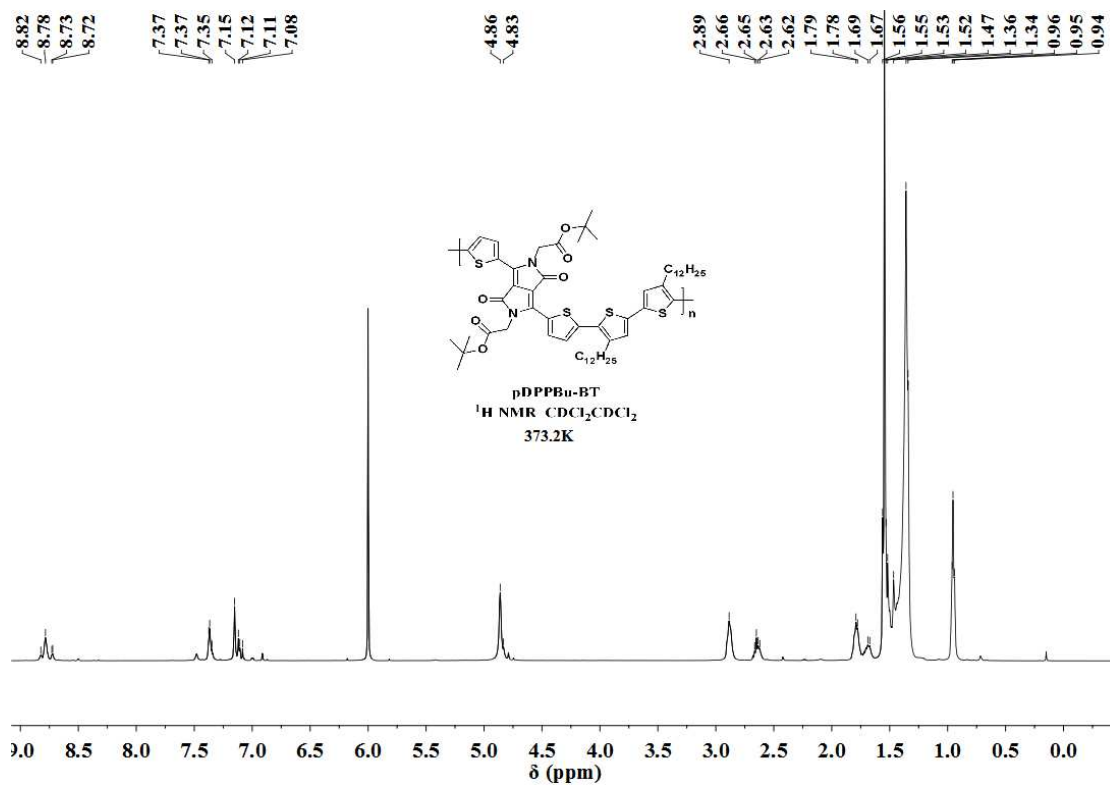

Figure S9.  $^1\text{H}$  NMR of pDPPBu-BT

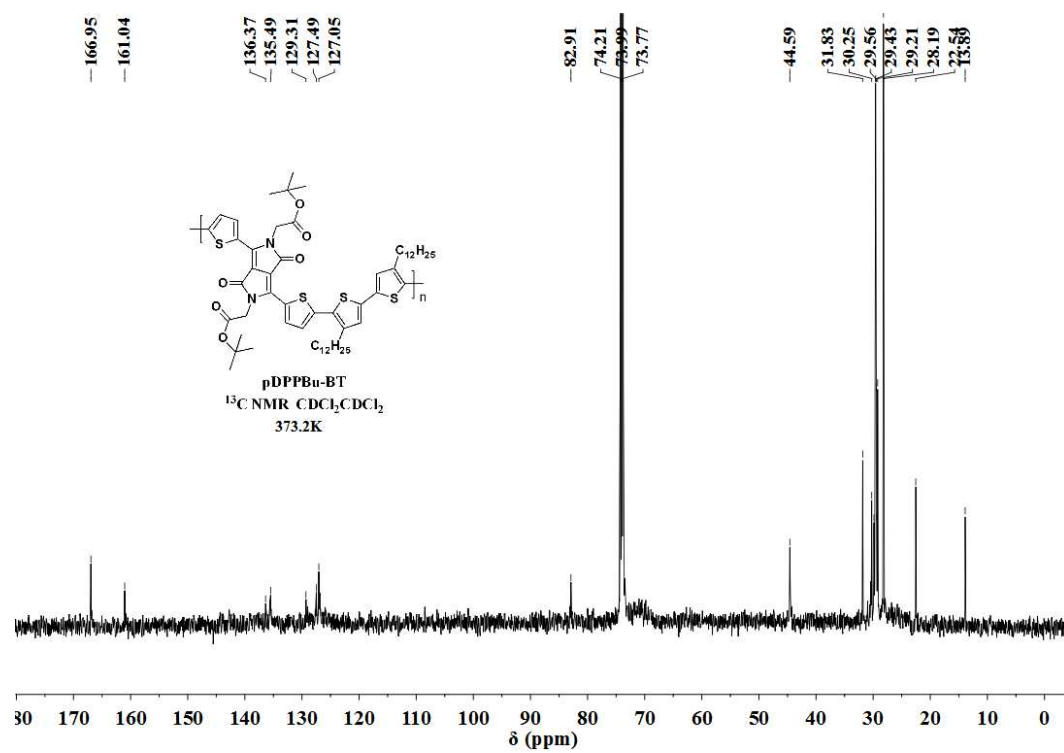

**Figure S10.**  $^{13}\text{C}$  NMR of pDPPBu-BT.
